# Supplementary material for: Risk of autoimmune diseases following COVID-19 and the potential protective effect from vaccination: a population-based cohort study
Source: PubMed Central journal article supplement — eClinicalMedicine. 2023 Aug 16;63:102154. doi: 10.1016/j.eclinm.2023.102154 (PMC10458663; doi:10.1016/j.eclinm.2023.102154), 2023-08-16
Supplement: mmc1.pdf [file mmc1.pdf]

Supplementary Figure 1 Subgroup analyses by sex.

A

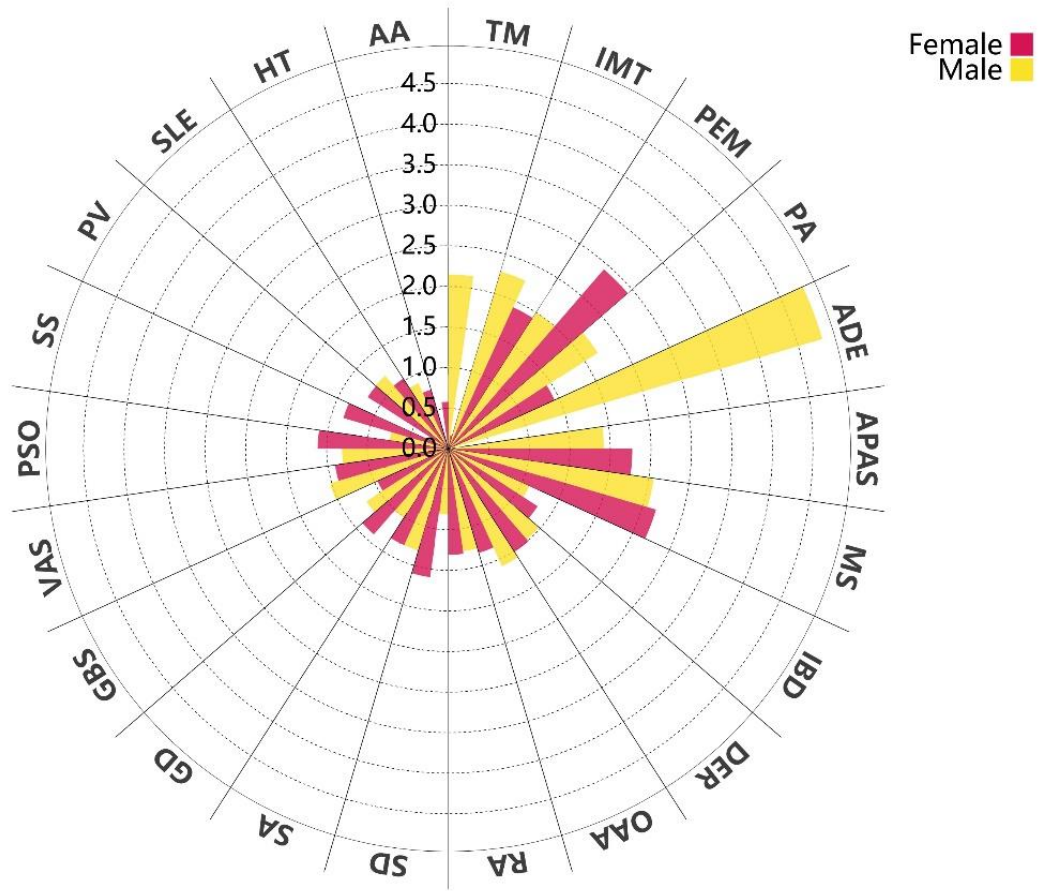

Y axis represent the hazard ratio associated with COVID-19 infection. Abbreviation: IBD: Inflammatory bowel diseases; PA: Pernicious anaemia; SA: Spondyloarthritis; RA: Rheumatoid arthritis; DER: Dermatopolymyositis; OAA: Other autoimmune arthritis; PSO: Psoriasis; AA: Alopecia areata; PV: Pemphigus vulgaris; PEM: Pemphigoid; VAS: Vasculitis; HT: Hashimoto's thyroiditis; GD: Graves' disease; IMT: Immune mediated thrombocytopenia; APAS: Anti-phospholipid antibody syndrome; GBS: Guillain barre syndrome, ADE: Acute disseminated encephalomyelitis; TM: transverse myelitis; SLE: Systemic lupus erythematosus, SD: Sjogren disease; SS: Systemic sclerosis; MS: Multiple sclerosis.

Supplementary Figure 2 Subgroup analyses by age group.

B

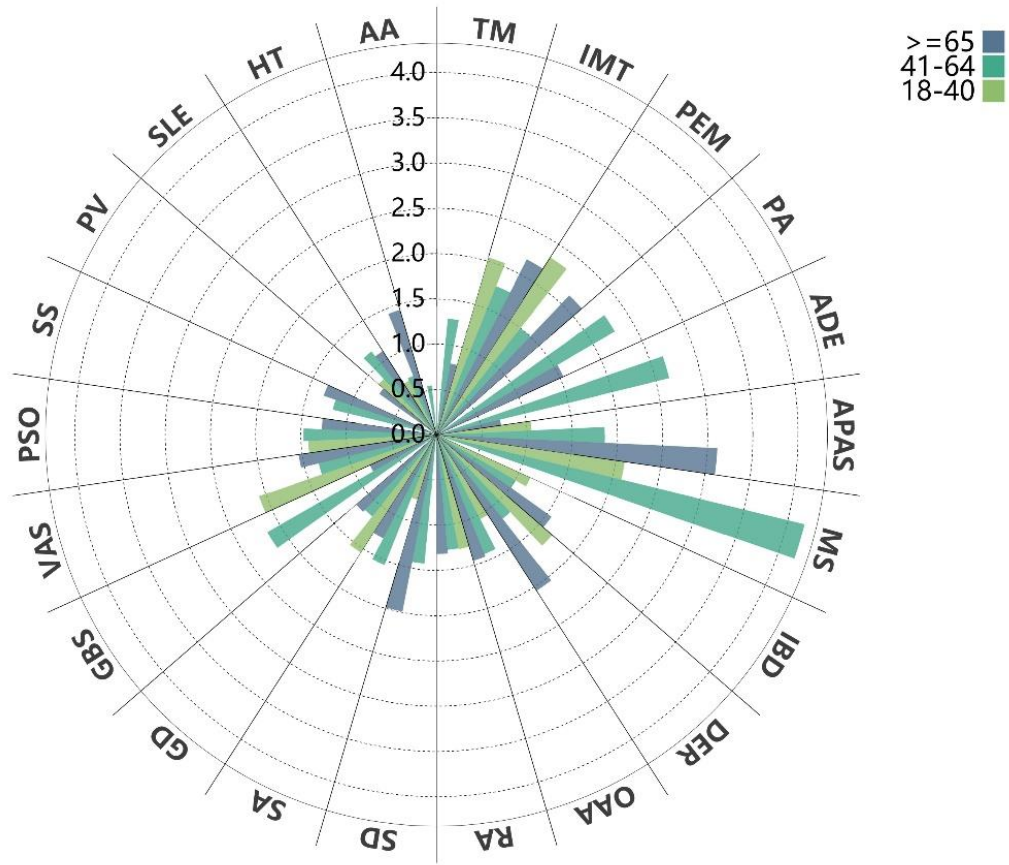

Y axis represent the hazard ratio associated with COVID-19 infection. Abbreviation: IBD: Inflammatory bowel diseases; PA: Pernicious anaemia; SA: Spondyloarthritis; RA: Rheumatoid arthritis; DER: Dermatopolymyositis; OAA: Other autoimmune arthritis; PSO: Psoriasis; AA: Alopecia areata; PV: Pemphigus vulgaris; PEM: Pemphigoid; VAS: Vasculitis; HT: Hashimoto's thyroiditis; GD: Graves' disease; IMT: Immune mediated thrombocytopenia; APAS: Anti-phospholipid antibody syndrome; GBS: Guillain barre syndrome, ADE: Acute disseminated encephalomyelitis; TM: transverse myelitis; SLE: Systemic lupus erythematosus, SD: Sjogren disease; SS: Systemic sclerosis; MS: Multiple sclerosis.

Supplementary Figure 3 Subgroup analyses by COVID severity.

C

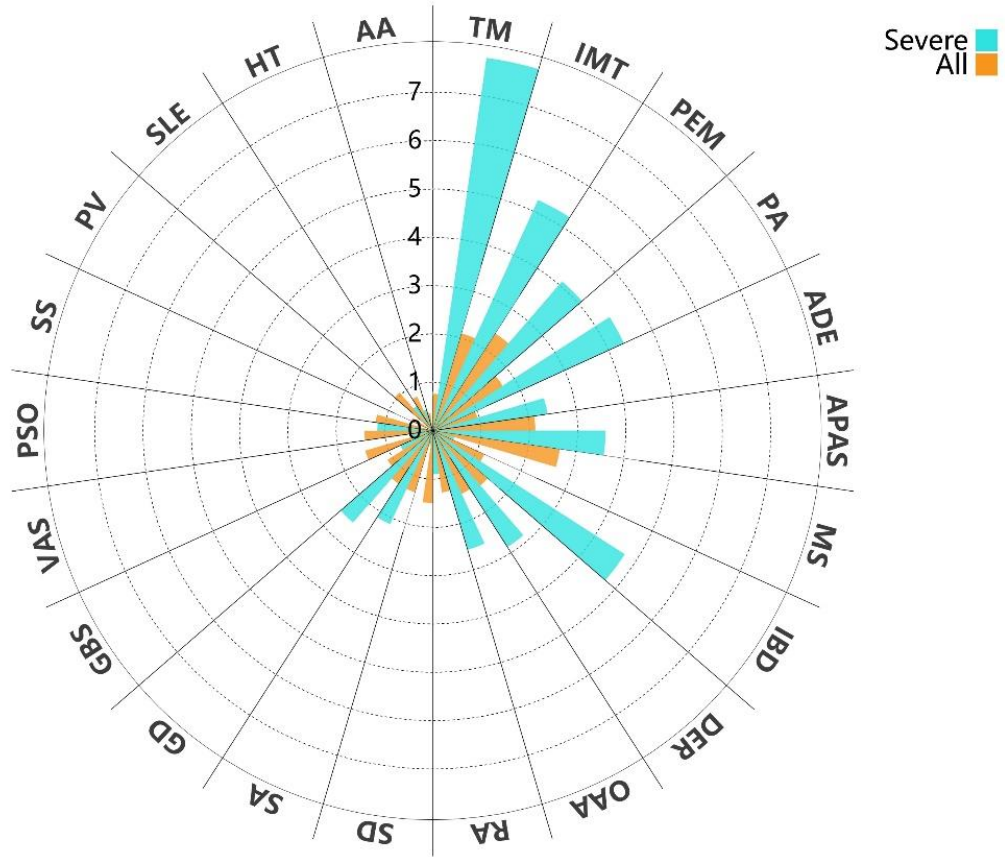

Y axis represent the hazard ratio associated with COVID-19 infection. Abbreviation: IBD: Inflammatory bowel diseases; PA: Pernicious anaemia; SA: Spondyloarthritis; RA: Rheumatoid arthritis; DER: Dermatopolymyositis; OAA: Other autoimmune arthritis; PSO: Psoriasis; AA: Alopecia areata; PV: Pemphigus vulgaris; PEM: Pemphigoid; VAS: Vasculitis; HT: Hashimoto's thyroiditis; GD: Graves' disease; IMT: Immune mediated thrombocytopenia; APAS: Anti-phospholipid antibody syndrome; GBS: Guillain barre syndrome, ADE: Acute disseminated encephalomyelitis; TM: transverse myelitis; SLE: Systemic lupus erythematosus, SD: Sjogren disease; SS: Systemic sclerosis; MS: Multiple sclerosis.

Supplementary Figure 4 Sensitivity analyses applying 28-day washout period.

D

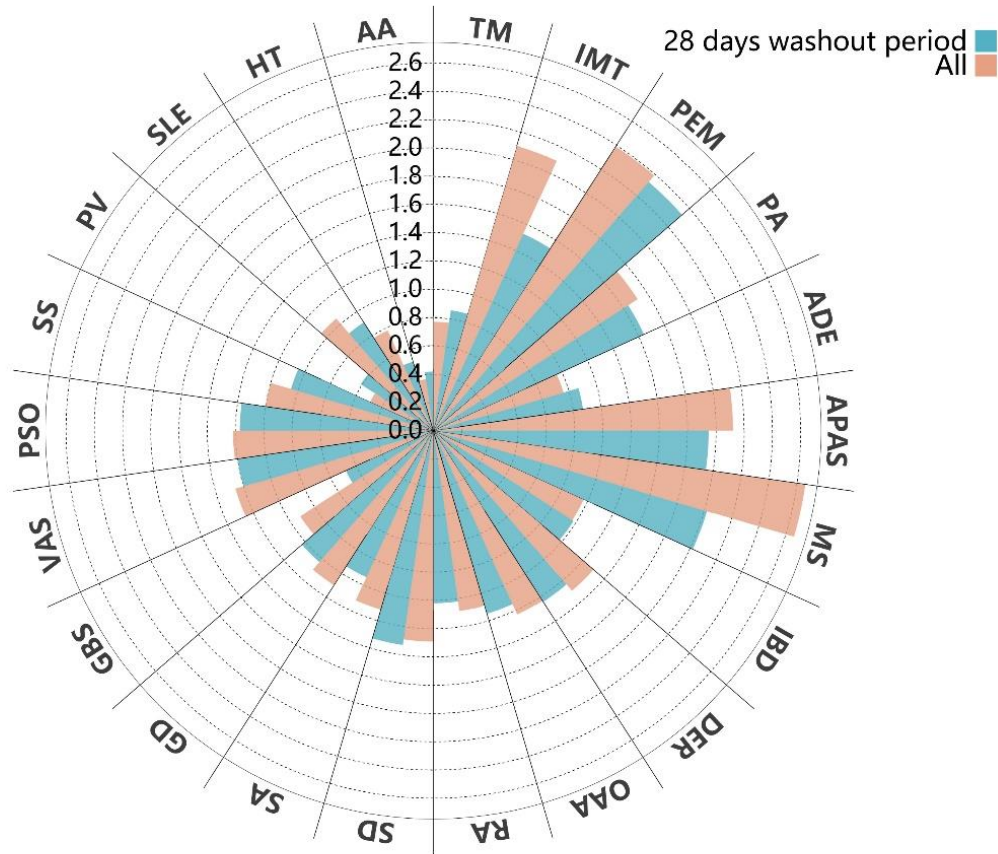

Y axis represent the hazard ratio associated with COVID-19 infection. Abbreviation: IBD: Inflammatory bowel diseases; PA: Pernicious anaemia; SA: Spondyloarthritis; RA: Rheumatoid arthritis; DER: Dermatopolymyositis; OAA: Other autoimmune arthritis; PSO: Psoriasis; AA: Alopecia areata; PV: Pemphigus vulgaris; PEM: Pemphigoid; VAS: Vasculitis; HT: Hashimoto's thyroiditis; GD: Graves' disease; IMT: Immune mediated thrombocytopenia; APAS: Anti-phospholipid antibody syndrome; GBS: Guillain barre syndrome, ADE: Acute disseminated encephalomyelitis; TM: transverse myelitis; SLE: Systemic lupus erythematosus, SD: Sjogren disease; SS: Systemic sclerosis; MS: Multiple sclerosis.



**Supplementary Figure 5 Protective effect of COVID-19 vaccine among COVID-19 patients ( $\geq 2$  doses versus 0-1 dose) \***

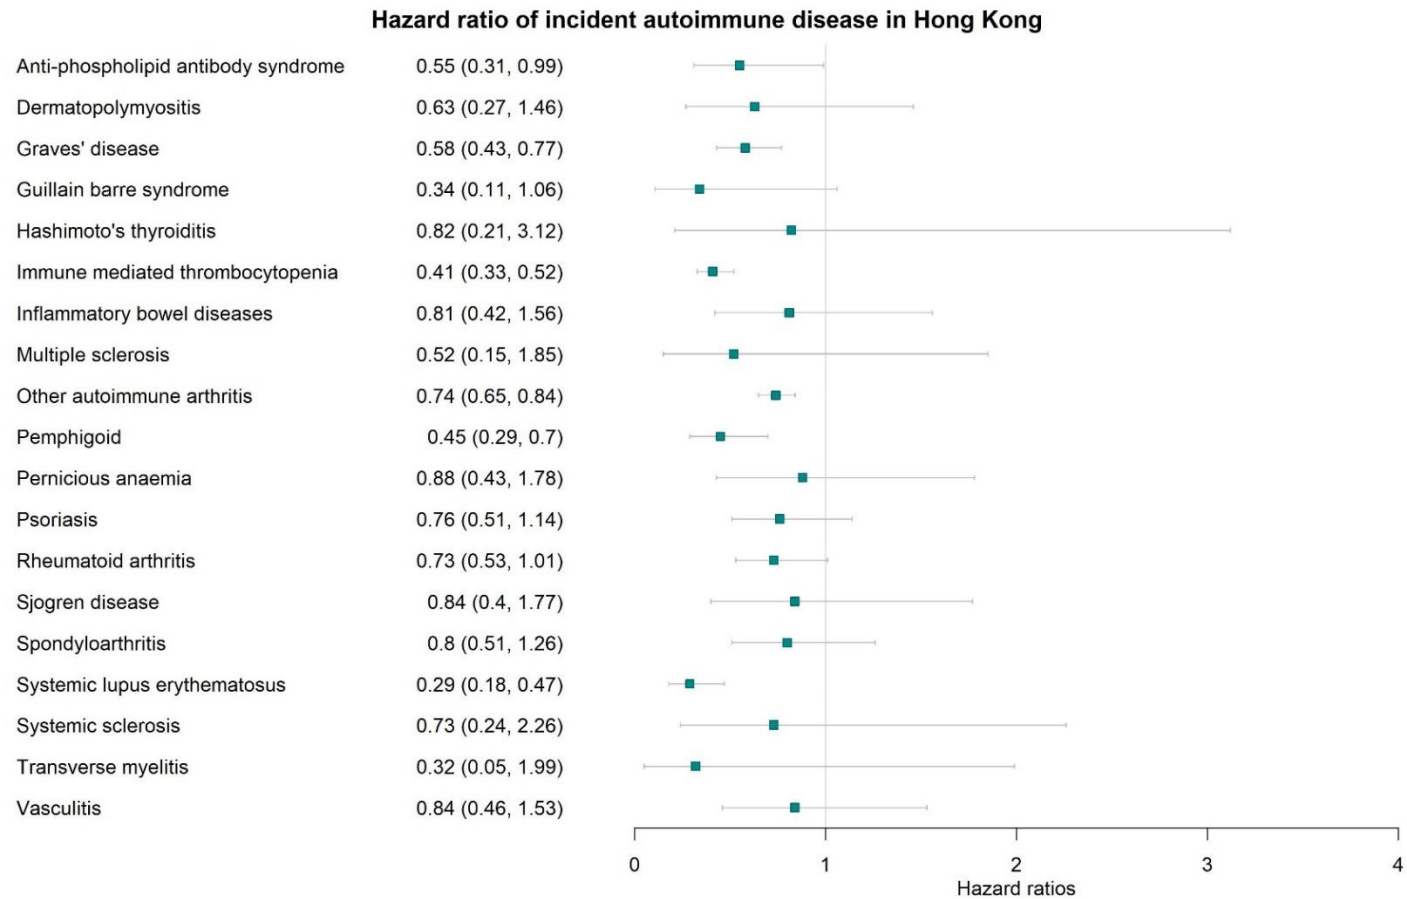

\*COVID-19 vaccinated (2/3/4 dose) population versus COVID-19 unvaccinated (0/1 dose) population, adjusting for age, sex, Charlson comorbidity index

**Supplementary Table 1 International Classification of Diseases, Ninth Revision (ICD-9) codes used to identify autoimmune diseases and other comorbidities**

| Description                   |                                                                         | ICD9 codes  |
|-------------------------------|-------------------------------------------------------------------------|-------------|
| <b>Digestive system</b>       |                                                                         |             |
| Inflammatory bowel diseases   |                                                                         | 555-556     |
| Pernicious anaemia            |                                                                         | 281.0       |
| <b>Musculoskeletal system</b> |                                                                         |             |
| Rheumatoid arthritis          |                                                                         | 714         |
| Dermatopolymyositis           |                                                                         | 710.3-710.4 |
| Spondyloarthritis             | Ankylosing spondylitis                                                  | 720         |
|                               | Reiter's disease                                                        | 099.3       |
|                               | Arthropathy associated with Reiter's disease and nonspecific urethritis | 711.1       |
|                               | Postdysenteric arthropathy                                              | 711.3       |

|                             |                                                  |              |
|-----------------------------|--------------------------------------------------|--------------|
| Other                       | Arthropathy associated with other viral diseases | 711.5        |
| autoimmune                  | Transient arthropathy                            | 716.4        |
| arthritis                   | Unspecified polyarthropathy or polyarthrititis   | 716.5        |
|                             | Unspecified monoarthritis                        | 716.6        |
|                             | Unspecified arthropathy                          | 716.9        |
|                             | Pain in joint                                    | 719.4        |
| <b>Integumentary system</b> |                                                  |              |
| Psoriasis                   |                                                  | 696          |
| Alopecia areata             |                                                  | 704.01       |
| Pemphigus vulgaris          |                                                  | 694.4        |
| Pemphigoid                  |                                                  | 694.5, 694.6 |
| <b>Endocrine system</b>     |                                                  |              |
| Hashimoto's thyroiditis     |                                                  | 245.2        |

|                                                     |                                                                   |        |
|-----------------------------------------------------|-------------------------------------------------------------------|--------|
| Graves' disease                                     |                                                                   | 242.0  |
| <b>Haematological system</b>                        |                                                                   |        |
| Anti-phospholipid<br>antibody<br>syndrome           | Other and unspecified nonspecific immunological findings          | 795.79 |
|                                                     | Haemorrhagic disorder due to intrinsic circulating anticoagulants | 286.5  |
|                                                     | Other specified diseases of blood and blood-forming organs        | 289.89 |
| Immune mediated<br>thrombocytopenia                 | Primary immune mediated thrombocytopenia                          | 287.3  |
|                                                     | Secondary immune mediated thrombocytopenia                        | 287.4  |
|                                                     | Immune mediated thrombocytopenia, unspecified                     | 287.5  |
|                                                     | Wiskott-Aldrich syndrome                                          | 279.12 |
|                                                     | Haemolytic-uremic syndrome                                        | 283.11 |
|                                                     | Pancytopenia                                                      | 284.1  |
|                                                     | Thrombotic microangiopathy                                        | 446.6  |
| Transient neonatal immune mediated thrombocytopenia | 776.1                                                             |        |

|                                            |                                                               |       |
|--------------------------------------------|---------------------------------------------------------------|-------|
| <b>Multi system</b>                        |                                                               |       |
| Systemic lupus erythematosus               |                                                               | 710.0 |
| Multiple sclerosis                         |                                                               | 340   |
| Sjogren disease                            |                                                               | 710.2 |
| Systemic sclerosis                         |                                                               | 710.1 |
| <b>Nervous system</b>                      |                                                               |       |
| Guillain barre<br>syndrome                 | Acute infective polyneuritis                                  | 357.0 |
|                                            | Other inflammatory and toxic neuropathy                       | 357.8 |
|                                            | Unspecified inflammatory and toxic neuropathy                 | 357.9 |
| Acute<br>disseminated<br>encephalomyelitis | Postinfectious encephalitis, myelitis, and encephalomyelitis  | 323.6 |
|                                            | Other causes of encephalitis, myelitis, and encephalomyelitis | 323.8 |
| Transverse                                 | Acute (transverse) myelitis                                   | 341.2 |

|                          |                                                                                           |       |
|--------------------------|-------------------------------------------------------------------------------------------|-------|
| myelitis                 | Encephalitis, myelitis, and encephalomyelitis in viral diseases classified elsewhere      | 323.0 |
|                          | Other encephalitis, myelitis, and encephalomyelitis due to infection classified elsewhere | 323.4 |
|                          | Encephalitis, myelitis, and encephalomyelitis following immunization procedures           | 323.5 |
|                          | Postinfectious encephalitis, myelitis, and encephalomyelitis                              | 323.6 |
|                          | Other causes of encephalitis, myelitis, and encephalomyelitis                             | 323.8 |
| <b>Vasculitis</b>        |                                                                                           |       |
| Cutaneous vasculitis     |                                                                                           | 709.1 |
| Isolated aortitis        |                                                                                           | 709.3 |
| Polyarteritis nodosa     |                                                                                           | 446.0 |
| Giant cell arteritis     |                                                                                           | 446.5 |
| Allergic purpura         |                                                                                           | 287.0 |
| ANCA positive vasculitis |                                                                                           | 447.6 |

|                                       |                                                         |
|---------------------------------------|---------------------------------------------------------|
| <b>Charlson Comorbidity Index</b>     |                                                         |
| Myocardial infarction                 | 410                                                     |
| Peripheral vascular disease           | 441, 443.9, 785.4, V43.4                                |
| Cerebrovascular disease               | 430-438                                                 |
| Chronic obstructive pulmonary disease | 490-496, 500-505, 506.4                                 |
| Dementia                              | 290                                                     |
| Paralysis                             | 342, 344.1                                              |
| Chronic renal failure                 | 582, 585, 586, 588, 583.0-583.2,<br>583.4, 583.6, 583.7 |
| Mild liver disease                    | 571.2, 571.4, 571.5, 571.6                              |
| Moderate-Severe COVID liver disease   | 456.0, 456.1, 456.2, 572.2, 572.3,<br>572.4, 572.8      |
| Peptic ulcers                         | 531-534                                                 |

|                                            |                                                                                               |
|--------------------------------------------|-----------------------------------------------------------------------------------------------|
| Diabetes without chronic complication      | 250.0, 250.1, 250.2, 250.3, 250.7                                                             |
| Diabetes with chronic complication         | 250.4, 250.5, 250.6                                                                           |
| Acquired Immune Deficiency Syndrome (AIDS) | 042                                                                                           |
| Malignancy                                 | 140-149, 150-159, 180-189, 170, 171,<br>172, 174, 175, 176, 179, 160-165,<br>190-195, 200-208 |
| Metastatic solid tumour                    | 196-199                                                                                       |



**Supplementary Table 2 Risk of newly diagnosed systemic/organ-specific autoimmune disease after COVID-19**

| Description                        | Hazard ratio      | P value |
|------------------------------------|-------------------|---------|
| Organ-specific autoimmune diseases | 1.41 (1.28, 1.55) | <0.001  |
| Systemic autoimmune diseases       | 1.49 (1.41, 1.58) | <0.001  |

**Organ-specific autoimmune diseases:** Inflammatory bowel diseases; Spondyloarthritis; Psoriasis; Hashimoto's thyroiditis; Graves' disease; Alopecia areata; Pemphigus vulgaris; Pernicious anaemia; Pemphigoid; Guillain barre syndrome; Isolated aortitis; Cutaneous vasculitis; Acute disseminated encephalomyelitis; Transverse myelitis.

**Systemic autoimmune diseases:** Systemic lupus erythematosus; Rheumatoid arthritis; Sjogren disease; Systemic sclerosis; Dermatopolymyositis; Multiple sclerosis; Polyarteritis nodosa; Giant cell arteritis; Allergic purpura; ANCA positive vasculitis; Anti-phospholipid antibody syndrome; Immune mediated thrombocytopenia; Other autoimmune arthritis.

**Supplementary Table 3 Hazard ration of COVID-19 estimated by flexible parametric survival model and Cox survival model**

| <b>Outcomes</b>                  | <b>HR (95% CI) estimated by flexible parametric survival model</b> | <b>HR (95% CI) estimated by Cox survival model</b> |
|----------------------------------|--------------------------------------------------------------------|----------------------------------------------------|
| Spondyloarthritis                | 1.31 (1.1,1.56)                                                    | 1.32 (1.03,1.69)                                   |
| Rheumatoid arthritis             | 1.29 (1.14,1.45)                                                   | 1.29 (1.09,1.54)                                   |
| Other autoimmune disease         | 1.43 (1.36,1.51)                                                   | 1.43 (1.33,1.54)                                   |
| Alopecia areata                  | 0.35 (0.11,1.1)                                                    | 0.35 (0.05,2.96)                                   |
| Hashimoto's thyroiditis          | 0.77 (0.5,1.21)                                                    | 0.78 (0.4,1.54)                                    |
| Immune mediated thrombocytopenia | 2.09 (1.88,2.32)                                                   | 2.1 (1.82,2.43)                                    |
| Systemic lupus erythematosus     | 1.05 (0.87,1.26)                                                   | 1.05 (0.79,1.39)                                   |
| Multiple sclerosis               | 2.66 (1.4,5.03)                                                    | 2.66 (1.17,6.05)                                   |
| Guillain barre syndrome          | 1.13 (0.72,1.76)                                                   | 1.12 (0.58,2.19)                                   |
